# Supplementary material for: Entwicklung und Evaluation einer Ultraschallnavigation für Freihandbiopsien kleiner Raumforderungen im Kopf-Hals-Bereich
Source: Springer Nature journal article supplement (doi:10.1007/s00106-023-01385-9), 2023-12-05
Supplement: MOESM1 [file 26495228]

**Abb. S1** 3D-Adapter für das Ultraschallgerät.

Der Adapter befestigt das Trackingtool am Ultraschallgerät. A: CAD-Modell. B: ausgedruckter Adapter mit Navigationstool. Der Adapter wird an die Geometrie des Ultraschallgerätes angepasst. Er ist abnehmbar und sterilisierbar.

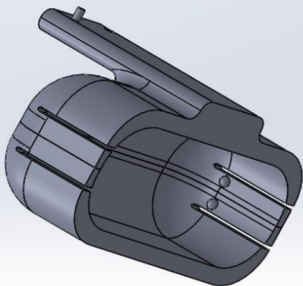

**A**

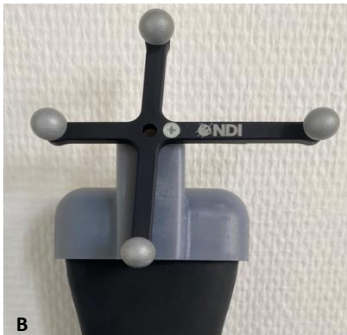

**B**
